# Supplementary material
Source: HighWire-hosted journal article supplement (https://diabetes.diabetesjournals.org/content/suppl/2007/07/05/db07-0502)
Supplement: db07-0502_supplemental_figure_1.pdf [file db07-0502_supplemental_figure_1.pdf]

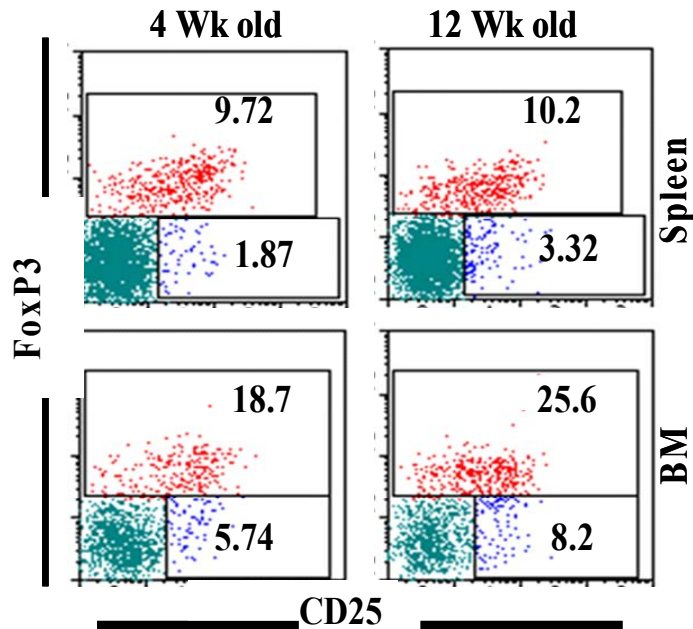

**Supplemental fig. 1: BM carries proportionately higher number of CD4+CD25+ T cells in NOD mice.** Single cell suspensions of spleen and BM from 4 and 12 week old euglycemic NOD female mice were analyzed by multicolor FACS. Cells were stained with anti-CD4 -PE-TR, anti-Foxp3-PE anti-CD25-FITC reagents. Cells gated for CD4+ population are shown. Percent values of Foxp3+ cells (upper rectangle) and Foxp3-CD25+ cells (lower rectangle) are shown in each panel. Representative panels from an assay that was carried out using 5 mice/group are shown.
